# Supplementary material for: Genetic Testing to Inform Epilepsy Treatment Management From an International Study of Clinical Practice
Source: PubMed Central journal article supplement — JAMA Neurol. 2022 Oct 31;79(12):1267–76. doi: 10.1001/jamaneurol.2022.3651 (PMC9623482; doi:10.1001/jamaneurol.2022.3651), 2022-10-31
Supplement: jamaneurol-e223651-s001.pdf [file jamaneurol-e223651-s001.pdf]

## Supplementary Online Content

McKnight D, Morales A, Hatchell KE, et al; ELEVIATE Consortium. Genetic testing to inform epilepsy treatment management from an international study of clinical practice. *JAMA Neurol*. Published online October 31, 2022. doi:10.1001/jamaneurol.2022.3651

### **eMethods.**

**eTable 1.** Demographic Information for Study Cohort and Nonresponder Cohort

**eTable 2.** Frequency of Positive Findings by Gene Among the Study Cohort (Responders) and the Nonresponder Cohort

**eTable 3.** Genes With Definitive Genetic Diagnoses in This Study Cohort

**eTable 4.** Patient Outcomes After Treatment Changes by Gene With Diagnostic Finding

**eTable 5.** Summary of Treatment Changes Noted for Patients With Seizures That Resolved

**eFigure 1.** Flowchart of Cohort Development

**eFigure 2.** Types of Referrals to Specialists

**eFigure 3.** Clinical Management Changes by Age

**eFigure 4.** Frequency of Seizures Before and After Changes in Clinical Management in Pediatric and Adult Cohorts

This supplementary material has been provided by the authors to give readers additional information about their work.

## eMethods

### Sequencing and Variant Interpretation

Next-generation sequencing (NGS) based multi-gene panel testing for epilepsy-related genes was conducted as previously described.<sup>6</sup> Briefly, genes from the epilepsy panel were targeted and sequenced via a short-read NGS assay that used genomic DNA extracted from blood or saliva samples. A bioinformatics pipeline aligned sequencing reads and utilized community standard and custom algorithms that identified single nucleotide variants (SNVs), small insertions or deletions (indels), large indels, structural variants, and exon-level copy number variants (CNVs). Variants were classified using the points-based Sherlock framework based on the joint consensus guidelines from the American College of Medical Genetics and Genomics and the Association for Molecular Pathology.<sup>21</sup> A definitive genetic diagnosis was defined as one pathogenic or likely pathogenic (P/LP) variant in a gene with autosomal dominant and X-linked inheritance or two P/LP variants in a gene with autosomal recessive inheritance. A gene reported in the literature with at least 1 published study demonstrating improved clinical presentation (i.e. reduced seizures or movement issues) in a series of human participants was classified as clinically actionable (eTable 2). Reports of a single individual or family or included only animal studies or a hypothetical therapy were not sufficient.

### CRF questions sent to healthcare providers

1. Please enter the Invitae RQ number for whom you are completing this survey. Only one RQ number should be associated with each set of questions.
  - a. Patient identification number
2. The most actionable finding in this patient was in which gene? Select all that apply:
  - a. Select from this list of genes:

|                 |                |               |               |                 |                 |                |
|-----------------|----------------|---------------|---------------|-----------------|-----------------|----------------|
| <i>ADSL</i>     | <i>CLN3</i>    | <i>GABRA1</i> | <i>KCNB1</i>  | <i>PCDH19</i>   | <i>SCN1B</i>    | <i>ST3GAL5</i> |
| <i>ALDH5A1</i>  | <i>CLN5</i>    | <i>GABRB2</i> | <i>KCNC1</i>  | <i>PIGA</i>     | <i>SCN2A</i>    | <i>STRADA</i>  |
| <i>ALDH7A1</i>  | <i>CLN6</i>    | <i>GABRB3</i> | <i>KCNH2</i>  | <i>PIGN</i>     | <i>SCN3A</i>    | <i>STX1B</i>   |
| <i>ALG13</i>    | <i>CLN8</i>    | <i>GABRG2</i> | <i>KCNJ10</i> | <i>PIGO</i>     | <i>SCN5A</i>    | <i>STXBP1</i>  |
| <i>AMT</i>      | <i>CNTNAP2</i> | <i>GAMT</i>   | <i>KCNMA1</i> | <i>PLCB1</i>    | <i>SCN8A</i>    | <i>SYN1</i>    |
| <i>ARHGEF9</i>  | <i>CSTB</i>    | <i>GATM</i>   | <i>KCNQ2</i>  | <i>PNKD</i>     | <i>SCN9A</i>    | <i>SYNGAP1</i> |
| <i>ARX</i>      | <i>CTSD</i>    | <i>GCSH</i>   | <i>KCNQ3</i>  | <i>PNKP</i>     | <i>SERPINI1</i> | <i>SYNJ1</i>   |
| <i>ATP1A2</i>   | <i>DEPDC5</i>  | <i>GLDC</i>   | <i>KCNT1</i>  | <i>PNPO</i>     | <i>SGCE</i>     | <i>SZT2</i>    |
| <i>ATP1A3</i>   | <i>DNAJC5</i>  | <i>GLRA1</i>  | <i>KCTD7</i>  | <i>POLG</i>     | <i>SIK1</i>     | <i>TBC1D24</i> |
| <i>ATRX</i>     | <i>DNM1</i>    | <i>GNAO1</i>  | <i>LGI1</i>   | <i>PPT1</i>     | <i>SLC2A1</i>   | <i>TCF4</i>    |
| <i>BRAT1</i>    | <i>DOCK7</i>   | <i>GOSR2</i>  | <i>LIAS</i>   | <i>PRICKLE1</i> | <i>SLC6A1</i>   | <i>TPK1</i>    |
| <i>C12orf57</i> | <i>DYNC1H1</i> | <i>GPHN</i>   | <i>MBD5</i>   | <i>PRIMA1</i>   | <i>SLC6A8</i>   | <i>TSC1</i>    |
| <i>CACNA1A</i>  | <i>DYRK1A</i>  | <i>GRIN1</i>  | <i>MECP2</i>  | <i>PRRT2</i>    | <i>SLC9A6</i>   | <i>TSC2</i>    |
| <i>CACNA2D2</i> | <i>EEF1A2</i>  | <i>GRIN2A</i> | <i>MEF2C</i>  | <i>PTEN</i>     | <i>SLC12A5</i>  | <i>UBE3A</i>   |
| <i>CARS2</i>    | <i>EFHC1</i>   | <i>GRIN2B</i> | <i>MFSD8</i>  | <i>PURA</i>     | <i>SLC13A5</i>  | <i>WDR45</i>   |
| <i>CASK</i>     | <i>EHMT1</i>   | <i>HCN1</i>   | <i>MTOR</i>   | <i>QARS</i>     | <i>SLC19A3</i>  | <i>WWOX</i>    |
| <i>CDKL5</i>    | <i>EPM2A</i>   | <i>HNRNPU</i> | <i>NEDD4L</i> | <i>RANBP2</i>   | <i>SLC25A12</i> | <i>ZDHHC9</i>  |

|                    |               |                |               |               |                 |             |
|--------------------|---------------|----------------|---------------|---------------|-----------------|-------------|
| <i>CHD2</i>        | <i>FARS2</i>  | <i>IER3IP1</i> | <i>NEXMIF</i> | <i>RBFOX1</i> | <i>SLC25A22</i> | <i>ZEB2</i> |
| <i>CHRNA2</i>      | <i>FLNA</i>   | <i>IQSEC2</i>  | <i>NGLY1</i>  | <i>RELN</i>   | <i>SLC35A2</i>  |             |
| <i>CHRNA4</i>      | <i>FOLR1</i>  | <i>ITPA</i>    | <i>NHLRC1</i> | <i>ROGDI</i>  | <i>SMC1A</i>    |             |
| <i>CHRN2</i>       | <i>FOXG1</i>  | <i>JMJD1C</i>  | <i>NPRL3</i>  | <i>SATB2</i>  | <i>SNX27</i>    |             |
| <i>CLCN4</i>       | <i>FRRS1L</i> | <i>KANSL1</i>  | <i>NRXN1</i>  | <i>SCARB2</i> | <i>SPATA5</i>   |             |
| <i>CLN2 (TPP1)</i> | <i>GABBR2</i> | <i>KCNA2</i>   | <i>PACS1</i>  | <i>SCN1A</i>  | <i>SPTAN1</i>   |             |

3. What is your specialty? Select all that apply:
  - a. Behavioral medicine
  - b. Endocrinology
  - c. Emergency medicine
  - d. Epilepsy
  - e. Family medicine
  - f. Genetics
  - g. Hematology-oncology
  - h. Internal medicine
  - i. Neurology
  - j. Neurosurgery
  - k. Pediatrics
  - l. Unsure
  - m. Other (please specify)
4. You, the clinician that ordered this genetic test, work in a (select all that apply):
  - a. Private practice
  - b. Children's Hospital
  - c. Academic Tertiary Care center
  - d. Community hospital
5. How was this patient referred to you?
  - a. Pediatrician
  - b. Family Medicine
  - c. Self-referral
  - d. Other (please specify)
6. Why did your patient have genetic testing?
  - a. Patient has a clinical presentation of epilepsy
  - b. Patient does not currently have seizures or a clinical presentation of epilepsy, but is at risk of having a familial epilepsy-causing variant
  - c. Patient is at risk of having a child with epilepsy
  - d. Other (please specify)
7. **If patient has a clinical presentation per question 6:** At what age did the patient begin to experience seizures?
  - a. 0-3 months
  - b. 4-6 months
  - c. 6-12 months
  - d. 1 year old
  - e. 2 years old
  - f. 3 years old
  - g. 4 years old
  - h. 5 years old
  - i. 6 years old
  - j. 7-17 years old
  - k. 18 years old or older

8. **If patient has a clinical presentation per question 6:** At what age was the patient clinically diagnosed with epilepsy?
- 0-3 months
  - 4-6 months
  - 6-12 months
  - 1 year old
  - 2 years old
  - 3 years old
  - 4 years old
  - 5 years old
  - 6 years old
  - 7-17 years old
  - 18 years old or older
9. **If patient has a clinical presentation per question 6:** At what frequency did seizures occur BEFORE the patient had a genetic diagnosis?
- 1 or more times a day
  - 1 or more times a week
  - 1 or more times a month
  - 1 or more times a year
10. At what age did the patient receive the genetic testing result from Invitae?
- 0-3 months
  - 4-6 months
  - 6-12 months
  - 1 year old
  - 2 years old
  - 3 years old
  - 4 years old
  - 5 years old
  - 6 years old
  - 7-17 years old
  - 18 years old or older
11. How would you describe the result obtained from Invitae? Note: if the variant was reclassified, please refer to the most recent reclassification when answering this question.
- It is a clinically actionable molecular diagnosis
  - It included a pathogenic or likely pathogenic result but was not a clinically actionable molecular diagnosis
  - It is an uncertain or negative (non-actionable) result
  - It confirmed previous known clinical genetic testing results for my patient
12. How did you determine whether clinical management (treatment indications or contraindications) were needed based on this diagnosis?
- I felt comfortable making clinical decisions for this patient on my own or with others from my practice
  - I utilized Invitae's genetic counselors to help me evaluate next steps for this patient
  - I utilized other resources in making clinical decisions for this patient
  - I have not used any outside resources in making clinical decisions for this patient yet, but I would like to
  - Other: \_\_\_\_\_
13. Did the genetic diagnosis lead to a change in clinical management?
- Yes
  - No
  - Unsure
14. **If Yes to Q13:** In what way did the genetic diagnosis lead to a change in clinical management? Select all that apply:
- Started a medication
  - Added a new medication to one already taking
  - Stopped one or more medications or treatment

- d. Medications stayed the same but dosage was changed
  - e. Diet change was recommended
  - f. Surgery was recommended
  - g. Monitoring for extra-neurological disease (please specify)
  - h. Referral to a specialist (please specify)
  - i. Other (please specify)
15. **If No to Q13:** Which of the following best describes the reason why no clinical management change was made?
- a. The result was not informative to clinical management
  - b. Current clinical management already consistent with the recommendations based on this genetic result
  - c. Recommended treatment refused by the patient
  - d. Results useful for informing future treatment possibilities
  - e. Other (please specify)
16. **If “Stopped one or more medications or treatment” on Q14”:** What medication(s) or treatments was(were) stopped? Select all that apply:
- a. Acetazolamide (Diamox, Diamox Sequels)
  - b. ACTH
  - c. Brivaracetam (Briviact)
  - d. Cannabidiol (Epidiolex)
  - e. Carbamazepine (Carbatrol, Eptol, Equetro, Tegretol, Tegretol XR)
  - f. Clobazam (Onfi, Frisium)
  - g. Clonazepam (KlonoPIN)
  - h. Eslicarbazepine acetate (Aptiom)
  - i. Ethosuximide (Zarontin)
  - j. Felbamate (Felbatol)
  - k. Immunoglobulins
  - l. Lacosamide (Vimpat)
  - m. Lamotrigine (Lamictal)
  - n. Levetiracetam (Keppra, Roweepra, Spritam)
  - o. Nitrazepam
  - p. Oxcarbazepine (Oxtellar XR, Trileptal)
  - q. Perampanel (Fycompa)
  - r. Phenobarbital (Solfoton, Luminal)
  - s. Phenytoin (Dilantin, Phenytek)
  - t. Prednisone (Rayos, Sterapred, Deltasone)
  - u. Pyridoxine (Vitamin B6, Vitelle Nestrex, Pyridoxal 5'-Phosphate)
  - v. Retigabine (Potiga)
  - w. Rufinamide (Banzel)
  - x. Steroids
  - y. Stiripentol (Diacomit)
  - z. Sulthiame
  - aa. Topiramate (Topamax, Qudexy XR Sprinkle, Topamax Sprinkle, Trokendi XR, Topiragen)
  - bb. Valproate
  - cc. Vigabatrin (Sabril, Vigadrone)
  - dd. Zonisamide (Zonegran)
  - ee. Atkins diet
  - ff. Casein free diet
  - gg. Gluten free diet
  - hh. Ketogenic diet
  - ii. Corpus callosotomy
  - jj. Gamma knife radiosurgery
  - kk. Hemispherectomy
  - ll. Lobectomy
  - mm. Resection surgery
  - nn. Subpial transection

- oo. Vagal nerve stimulator (VNS) surgery
  - pp. Other (please specify)
17. **If any choice on Q14 except for “Stopped one or more medications or treatment”, “Medications stayed the same but dosage was changed”, “Specialist evaluation (please specify)” or “other”:** What new medication(s) or treatments was(were) started? Select all that apply:
- a. Acetazolamide (Diamox, Diamox Sequels)
  - b. ACTH
  - c. Brivaracetam (Briviact)
  - d. Cannabidiol (Epidiolex)
  - e. Carbamazepine (Carbatrol, Epitol, Equetro, Tegretol, Tegretol XR)
  - f. Clobazam (Onfi, Frisium)
  - g. Clonazepam (KlonoPIN)
  - h. Eslicarbazepine acetate (Aptiom)
  - i. Ethosuximide (Zarontin)
  - j. Felbamate (Felbatol)
  - k. Immunoglobulins
  - l. Lacosamide (Vimpat)
  - m. Lamotrigine (Lamictal)
  - n. Levetiracetam (Keppra, Roweepra, Spritam)
  - o. Nitrazepam
  - p. Oxcarbazepine (Oxtellar XR, Trileptal)
  - q. Perampanel (Fycompa)
  - r. Phenobarbital (Solfoton, Luminal)
  - s. Phenytoin (Dilantin, Phenytek)
  - t. Prednisone (Rayos, Sterapred, Deltasone)
  - u. Pyridoxine (Vitamin B6, Vitelle Nestrex, Pyridoxal 5'-Phosphate)
  - v. Retigabine (Potiga)
  - w. Rufinamide (Banzel)
  - x. Steroids
  - y. Stiripentol (Diacomit)
  - z. Sulthiame
  - aa. Topiramate (Topamax, Qudexy XR Sprinkle, Topamax Sprinkle, Trokendi XR, Topiragen)
  - bb. Valproate
  - cc. Vigabatrin (Sabril, Vigadrone)
  - dd. Zonisamide (Zonegran)
  - ee. Atkins diet
  - ff. Casein free diet
  - gg. Gluten free diet
  - hh. Ketogenic diet
  - ii. Corpus callosotomy
  - jj. Gamma knife radiosurgery
  - kk. Hemispherectomy
  - ll. Lobectomy
  - mm. Resection surgery
  - nn. Subpial transection
  - oo. Vagal nerve stimulator (VNS) surgery
  - pp. Other (please specify)
18. **If yes to Q13:** When was the clinical management change made?
- a. No clinical management change
  - b. 0-3 months after the genetic diagnosis
  - c. 4-6 months after the genetic diagnosis
  - d. 6-12 months after the genetic diagnosis
  - e. 1 year or more after the genetic diagnosis
19. **If yes to Q13:** In the time since the clinical management change was made, how has the patient responded? Select all that apply:
- a. Not enough time has passed since the clinical management change to evaluate the outcome

- b. Unknown - have not followed up with the patient
  - c. No change in patient condition
  - d. Patient has reduced seizures
  - e. Patient seizures have stopped
  - f. Patient has reduced medication side effects
  - g. Patient has increased seizures
  - h. Patient has increased medication side effects
  - i. Patient has other improvements to their condition (please specify)
  - j. Patient has other decline in their condition (please specify)
20. **If yes to Q13:** At what frequency did seizures occur AFTER the clinical management change?
- a. No seizures have been observed
  - b. 1 or more times a day
  - c. 1 or more times a weekly
  - d. 1 or more times a month
  - e. 1 or more times a year
21. Did this result cause you to consider genetic testing in other unrelated patients with a similar phenotype?
- a. No, I was already doing testing for this type of patient
  - b. No, I will not test other similar patients
  - c. Yes, I have tested / will test additional similar patients

**eTable 1.** Demographic Information for Study Cohort and Nonresponder Cohort

|                                                   | <b>Responders<br/>(n=418)</b> | <b>Nonresponders<br/>(n=2,992)</b> | <b>p-value</b> |
|---------------------------------------------------|-------------------------------|------------------------------------|----------------|
| Age, years                                        |                               |                                    |                |
| Mean                                              | 6.9                           | 6.1                                | 0.07           |
| Median                                            | 4                             | 3                                  |                |
| Sex, males, n (%)                                 | 193 (46.2)                    | 1,395 (46.6)                       | 0.83           |
| Date of testing, n (%) <sup>a</sup>               |                               |                                    |                |
| 2016                                              | 19 (4.6)                      | 116 (3.9)                          | 0.07           |
| 2017                                              | 52 (12.5)                     | 365 (12.2)                         |                |
| 2018                                              | 95 (22.8)                     | 696 (23.3)                         |                |
| 2019                                              | 185 (44.4)                    | 1357 (45.4)                        |                |
| 2020                                              | 66 (15.8)                     | 458 (15.3)                         |                |
| Clinical actionability of genetic findings, n (%) |                               |                                    |                |
| Actionable                                        | 291 (69.0)                    | 2,026 (67.1)                       | 0.62           |
| Not actionable                                    | 131 (31.0)                    | 992 (32.9)                         |                |

<sup>a</sup>Date of testing was unavailable for one patient in the responder group



**eTable 2.** Frequency of Positive Findings by Gene Among the Study Cohort (Responders) and the Nonresponder Cohort

| Gene           | Responders<br>(n=418)<br>n (%) | Nonresponders<br>(n=2,992)<br>n (%) | Genetic finding<br>associated with<br>management<br>changes <sup>a</sup> | PMID                                                                         |
|----------------|--------------------------------|-------------------------------------|--------------------------------------------------------------------------|------------------------------------------------------------------------------|
| <i>SCN1A</i>   | 64 (15.3)                      | 465 (15.5)                          | Yes                                                                      | 20301494, 26600876,<br>26339958, 28538134,<br>24902755, 30061856             |
| <i>PRRT2</i>   | 41 (9.8)                       | 303 (10.1)                          | Yes                                                                      | 28056630, 29334453,<br>32392383                                              |
| <i>DEPDC5</i>  | 27 (6.5)                       | 100 (3.3)                           | Yes                                                                      | 26434565, 30782578,<br>27683934, 30093711                                    |
| <i>KCNQ2</i>   | 19 (4.5)                       | 204 (6.8)                           | Yes                                                                      | 25880994, 20437616,<br>27602407                                              |
| <i>MECP2</i>   | 16 (3.8)                       | 126 (4.2)                           | No                                                                       | –                                                                            |
| <i>PCDH19</i>  | 15 (3.6)                       | 107 (3.6)                           | Yes                                                                      | 26820223, 23712037                                                           |
| <i>TSC2</i>    | 14 (3.3)                       | 51 (1.7)                            | Yes                                                                      | 15563014, 10073425,<br>33346789, 24053983,<br>31335226, 32854808             |
| <i>STXBP1</i>  | 14 (3.3)                       | 79 (2.6)                            | Yes                                                                      | 27905812, 26865513                                                           |
| <i>KCNT1</i>   | 10 (2.4)                       | 45 (1.5)                            | Yes                                                                      | 26369628, 32167590,<br>31054119                                              |
| <i>SYNGAP1</i> | 10 (2.4)                       | 62 (2.1)                            | No                                                                       | –                                                                            |
| <i>SCN2A</i>   | 9 (2.2)                        | 82 (2.7)                            | Yes                                                                      | 28379373, 26291284                                                           |
| <i>SLC2A1</i>  | 8 (1.9)                        | 51 (1.7)                            | Yes                                                                      | 20301603, 32913944                                                           |
| <i>NPRL3</i>   | 8 (1.9)                        | 71 (2.4)                            | Yes                                                                      | 26434565, 26285051                                                           |
| <i>CACNA1A</i> | 8 (1.9)                        | 47 (1.6)                            | Yes                                                                      | 20301319, 21734179,<br>30142438                                              |
| <i>CHD2</i>    | 8 (1.9)                        | 63 (2.1)                            | Yes                                                                      | 31677157, 25672921                                                           |
| <i>CDKL5</i>   | 8 (1.9)                        | 69 (2.3)                            | Yes                                                                      | Pestana-Knight E et al.<br>Abstract 419. Presented<br>at AES. December 2020. |
| <i>ATP1A3</i>  | 7 (1.7)                        | 24 (0.8)                            | Yes                                                                      | 20301294, 25447930,<br>24996492, 24532324                                    |
| <i>UBE3A</i>   | 7 (1.7)                        | 52 (1.7)                            | No                                                                       | –                                                                            |
| <i>GABRG2</i>  | 7 (1.7)                        | 29 (1.0)                            | No                                                                       | –                                                                            |
| <i>ALDH7A1</i> | 6 (1.4)                        | 15 (0.5)                            | Yes                                                                      | 24664145, 20301659,<br>19142996, 24748525                                    |
| <i>GRIN2A</i>  | 6 (1.4)                        | 40 (1.3)                            | No                                                                       | –                                                                            |

| Gene                        | Responders<br>(n=418) | Nonresponders<br>(n=2,992) | Genetic finding<br>associated with<br>management<br>changes <sup>a</sup> | PMID                                                             |
|-----------------------------|-----------------------|----------------------------|--------------------------------------------------------------------------|------------------------------------------------------------------|
| <i>MBD5</i>                 | 5 (1.2)               | 18 (0.6)                   | No                                                                       | –                                                                |
| <i>SCN8A</i>                | 4 (1.0)               | 41 (1.4)                   | Yes                                                                      | 26252990, 26029160,<br>27559564, 25568300,<br>30615093           |
| <i>TBC1D24</i>              | 4 (1.0)               | 20 (0.7)                   | No                                                                       | –                                                                |
| <i>ALG13</i>                | 4 (1.0)               | 10 (0.3)                   | No                                                                       | –                                                                |
| <i>TPP1</i>                 | 4 (1.0)               | 32 (1.1)                   | Yes                                                                      | 2968815, 33604240,<br>33348105, 33202105                         |
| <i>GABRB3 and<br/>UBE3A</i> | 4 (1.0)               | 39 (1.3)                   | No                                                                       | –                                                                |
| <i>GPHN</i>                 | 4 (1.0)               | 7 (0.2)                    | No                                                                       | –                                                                |
| <i>STX1B</i>                | 4 (1.0)               | 13 (0.4)                   | No                                                                       | –                                                                |
| <i>SCN1B</i>                | 3 (0.7)               | 19 (0.6)                   | No                                                                       | –                                                                |
| <i>SLC6A1</i>               | 3 (0.7)               | 37 (1.2)                   | Yes                                                                      | 27600546, 25865495                                               |
| <i>SLC6A8</i>               | 3 (0.7)               | 13 (0.4)                   | Yes                                                                      | 24953403, 20301745                                               |
| <i>TCF4</i>                 | 3 (0.7)               | 18 (0.6)                   | No                                                                       | –                                                                |
| <i>WDR45</i>                | 3 (0.7)               | 25 (0.8)                   | No                                                                       | –                                                                |
| <i>FOXG1</i>                | 3 (0.7)               | 27 (0.9)                   | No                                                                       | –                                                                |
| <i>KCNA2</i>                | 3 (0.7)               | 20 (0.7)                   | Yes                                                                      | 34516822                                                         |
| <i>NEXMIF</i>               | 3 (0.7)               | 17 (0.6)                   | No                                                                       | –                                                                |
| <i>SCN9A</i>                | 3 (0.7)               | 7 (0.2)                    | No                                                                       | –                                                                |
| <i>SMC1A</i>                | 3 (0.7)               | 13 (0.4)                   | No                                                                       | –                                                                |
| <i>TSC1</i>                 | 2 (0.5)               | 36 (1.2)                   | Yes                                                                      | 15563014, 10073425,<br>33346789, 24053983,<br>31335226, 32854808 |
| <i>ARHGEF9</i>              | 2 (0.5)               | 5 (0.2)                    | No                                                                       | –                                                                |
| <i>ATP1A2</i>               | 2 (0.5)               | 7 (0.2)                    | No                                                                       | –                                                                |
| <i>GLDC</i>                 | 2 (0.5)               | 6 (0.2)                    | Yes                                                                      | 20301531, 26749113                                               |
| <i>HNRNPU</i>               | 2 (0.5)               | 23 (0.8)                   | No                                                                       | –                                                                |
| <i>KCNH2</i>                | 2 (0.5)               | 6 (0.2)                    | Yes                                                                      | 29097296, 24011539                                               |
| <i>IQSEC2</i>               | 2 (0.5)               | 22 (0.7)                   | No                                                                       | –                                                                |
| <i>KCNH5</i>                | 2 (0.5)               | 3 (0.1)                    | No                                                                       | –                                                                |
| <i>MEF2C</i>                | 2 (0.5)               | 10 (0.3)                   | No                                                                       | –                                                                |

| <b>Gene</b>                  | <b>Responders<br/>(n=418)</b> | <b>Nonresponders<br/>(n=2,992)</b> | <b>Genetic finding<br/>associated with<br/>management<br/>changes<sup>a</sup></b> | <b>PMID</b>                     |
|------------------------------|-------------------------------|------------------------------------|-----------------------------------------------------------------------------------|---------------------------------|
| <i>PIGN</i>                  | 2 (0.5)                       | 7 (0.2)                            | No                                                                                | –                               |
| <i>GRIN1</i>                 | 1 (0.2)                       | 9 (0.3)                            | No                                                                                | –                               |
| <i>KCNMA1</i>                | 1 (0.2)                       | 5 (0.2)                            | No                                                                                | –                               |
| <i>KCNQ3<sup>b</sup></i>     | 1 (0.2)                       | 11 (0.4)                           | No                                                                                | –                               |
| <i>POLG</i>                  | 1 (0.2)                       | 15 (0.5)                           | Yes                                                                               | 20301791, 20301791,<br>21038416 |
| <i>PURA</i>                  | 1 (0.2)                       | 19 (0.6)                           | No                                                                                | –                               |
| <i>RELN</i>                  | 1 (0.2)                       | 1 (<0.1)                           | No                                                                                | –                               |
| <i>SLC13A5</i>               | 1 (0.2)                       | 2 (0.1)                            | No                                                                                | –                               |
| <i>SPTAN1</i>                | 1 (0.2)                       | 7 (0.2)                            | No                                                                                | –                               |
| <i>WVOX</i>                  | 1 (0.2)                       | 6 (0.2)                            | No                                                                                | –                               |
| <i>ZEB2</i>                  | 1 (0.2)                       | 19 (0.6)                           | No                                                                                | –                               |
| <i>ARX</i>                   | 1 (0.2)                       | 15 (0.5)                           | No                                                                                | –                               |
| <i>ATP6AP2</i>               | 1 (0.2)                       | 0                                  | No                                                                                | –                               |
| <i>ATRX</i>                  | 1 (0.2)                       | 2 (0.1)                            | No                                                                                | –                               |
| <i>CASK</i>                  | 1 (0.2)                       | 5 (0.2)                            | No                                                                                | –                               |
| <i>CLCN4</i>                 | 1 (0.2)                       | 3 (0.1)                            | No                                                                                | –                               |
| <i>CLN3</i>                  | 1 (0.2)                       | 4 (0.1)                            | No                                                                                | –                               |
| <i>DIAPH1</i>                | 1 (0.2)                       | 0                                  | No                                                                                | –                               |
| <i>DNM1</i>                  | 1 (0.2)                       | 6 (0.2)                            | No                                                                                | –                               |
| <i>DYRK1A</i>                | 1 (0.2)                       | 19 (0.6)                           | No                                                                                | –                               |
| <i>GABRA1</i>                | 1 (0.2)                       | 17 (0.6)                           | No                                                                                | –                               |
| <i>GABRA1 and<br/>GABRG2</i> | 1 (0.2)                       | 0                                  | No                                                                                | –                               |
| <i>GABRB2</i>                | 1 (0.2)                       | 2 (0.1)                            | No                                                                                | –                               |
| <i>KCNB1</i>                 | 1 (0.2)                       | 13 (0.4)                           | No                                                                                | –                               |
| <i>KCNC1</i>                 | 1 (0.2)                       | 8 (0.3)                            | No                                                                                | –                               |
| <i>NHLRC1</i>                | 1 (0.2)                       | 2 (0.1)                            | Yes                                                                               | 20301563, 25667898              |
| <i>PNKP</i>                  | 1 (0.2)                       | 3 (0.1)                            | No                                                                                | –                               |
| <i>SLC9A6</i>                | 1 (0.2)                       | 4 (0.1)                            | No                                                                                | –                               |
| <i>GABRB3</i>                | 0                             | 18 (0.6)                           | No                                                                                | –                               |
| <i>FRRS1L</i>                | 0                             | 13 (0.4)                           | No                                                                                | –                               |

| Gene                    | Responders<br>(n=418) | Nonresponders<br>(n=2,992) | Genetic finding<br>associated with<br>management<br>changes <sup>a</sup> | PMID                            |
|-------------------------|-----------------------|----------------------------|--------------------------------------------------------------------------|---------------------------------|
| <i>GNAO1</i>            | 0                     | 13 (0.4)                   | Yes                                                                      | 29661126, 30103967,<br>31076915 |
| <i>EHMT1</i>            | 0                     | 12 (0.4)                   | No                                                                       | –                               |
| <i>EEF1A2</i>           | 0                     | 11 (0.4)                   | No                                                                       | –                               |
| <i>CNTNAP2</i>          | 0                     | 10 (0.3)                   | No                                                                       | –                               |
| <i>LGI1</i>             | 0                     | 10 (0.3)                   | Yes                                                                      | 20301709, 7647791               |
| <i>GRIN2B</i>           | 0                     | 9 (0.3)                    | No                                                                       | –                               |
| <i>PPT1</i>             | 0                     | 7 (0.2)                    | No                                                                       | –                               |
| <i>SCN5A</i>            | 0                     | 7 (0.2)                    | No                                                                       | –                               |
| <i>SPATA5</i>           | 0                     | 7 (0.2)                    | No                                                                       | –                               |
| <i>GLRA1</i>            | 0                     | 6 (0.2)                    | Yes                                                                      | 20301437, 25356525              |
| <i>HCN1</i>             | 0                     | 6 (0.2)                    | No                                                                       | –                               |
| <i>PTEN</i>             | 0                     | 6 (0.2)                    | No                                                                       | –                               |
| <i>SYN1</i>             | 0                     | 6 (0.2)                    | No                                                                       | –                               |
| <i>CHRNA4</i>           | 0                     | 5 (0.2)                    | Yes                                                                      | 32097883                        |
| <i>KANSL1</i>           | 0                     | 5 (0.2)                    | No                                                                       | –                               |
| <i>SATB2</i>            | 0                     | 5 (0.2)                    | No                                                                       | –                               |
| <i>SGCE</i>             | 0                     | 5 (0.2)                    | No                                                                       | –                               |
| <i>BRAT1</i>            | 0                     | 4 (0.1)                    | No                                                                       | –                               |
| <i>CLN5</i>             | 0                     | 4 (0.1)                    | No                                                                       | –                               |
| <i>EPM2A</i>            | 0                     | 4 (0.1)                    | Yes                                                                      | 20301563, 27459034              |
| <i>PACS1</i>            | 0                     | 4 (0.1)                    | No                                                                       | –                               |
| <i>PIGG</i>             | 0                     | 4 (0.1)                    | No                                                                       | –                               |
| <i>SCN3A</i>            | 0                     | 4 (0.1)                    | No                                                                       | –                               |
| <i>CLN6</i>             | 0                     | 3 (0.1)                    | No                                                                       | –                               |
| <i>KCTD7</i>            | 0                     | 3 (0.1)                    | No                                                                       | –                               |
| <i>NRXN1</i>            | 0                     | 3 (0.1)                    | No                                                                       | –                               |
| <i>QARS<sup>b</sup></i> | 0                     | 3 (0.1)                    | No                                                                       | –                               |
| <i>SLC35A2</i>          | 0                     | 3 (0.1)                    | No                                                                       | –                               |
| <i>ST3GAL5</i>          | 0                     | 3 (0.1)                    | No                                                                       | –                               |
| <i>TBL1XR1</i>          | 0                     | 3 (0.1)                    | No                                                                       | –                               |

| Gene                     | Responders<br>(n=418) | Nonresponders<br>(n=2,992) | Genetic finding<br>associated with<br>management<br>changes <sup>a</sup> | PMID                            |
|--------------------------|-----------------------|----------------------------|--------------------------------------------------------------------------|---------------------------------|
| <i>ADSL</i>              | 0                     | 2 (0.1)                    | No                                                                       | –                               |
| <i>GAMT</i>              | 0                     | 2 (0.1)                    | Yes                                                                      | 23622406, 20301745              |
| <i>GOSR2<sup>b</sup></i> | 0                     | 2 (0.1)                    | No                                                                       | –                               |
| <i>KCNJ10</i>            | 0                     | 2 (0.1)                    | No                                                                       | –                               |
| <i>MFSD8</i>             | 0                     | 2 (0.1)                    | No                                                                       | –                               |
| <i>NGLY1<sup>b</sup></i> | 0                     | 2 (0.1)                    | No                                                                       | –                               |
| <i>PIGA<sup>b</sup></i>  | 0                     | 2 (0.1)                    | No                                                                       | –                               |
| <i>SZT2</i>              | 0                     | 2 (0.1)                    | No                                                                       | –                               |
| <i>C12orf57</i>          | 0                     | 1 (<0.1)                   | No                                                                       | –                               |
| <i>CACNA2D2</i>          | 0                     | 1 (<0.1)                   | No                                                                       | –                               |
| <i>CHRNA2</i>            | 0                     | 1 (<0.1)                   | No                                                                       | –                               |
| <i>DNAJC5</i>            | 0                     | 1 (<0.1)                   | No                                                                       | –                               |
| <i>FLNA</i>              | 0                     | 1 (<0.1)                   | No                                                                       | –                               |
| <i>FOLR1</i>             | 0                     | 1 (<0.1)                   | Yes                                                                      | 20447151                        |
| <i>ITPA</i>              | 0                     | 1 (<0.1)                   | No                                                                       | –                               |
| <i>KCND2</i>             | 0                     | 1 (<0.1)                   | No                                                                       | –                               |
| <i>PNPO</i>              | 0                     | 1 (<0.1)                   | Yes                                                                      | 20301659, 20301659.<br>25639976 |
| <i>RANBP2</i>            | 0                     | 1 (<0.1)                   | No                                                                       | –                               |
| <i>ROGDI</i>             | 0                     | 1 (<0.1)                   | No                                                                       | –                               |
| <i>SIK1</i>              | 0                     | 1 (<0.1)                   | No                                                                       | –                               |
| <i>SYNJ1</i>             | 0                     | 1 (<0.1)                   | No                                                                       | –                               |

<sup>a</sup>All genes except *GLDC*, *RANBP2*, and *SLC13A5* were included in previous literature reviews. <sup>b</sup>These genes were classified as “emerging evidence” previously. Upon re-review of the literature, no studies in humans have indicated positive outcomes.

**Table 3.** Genes With Definitive Genetic Diagnoses in This Study Cohort

| Gene    | hgvs                           | Variant                           | n <sup>a</sup> |
|---------|--------------------------------|-----------------------------------|----------------|
| ALDH7A1 | NM_001182.4:c.1279G>C          | p.Glu427Gln                       | 3 <sup>b</sup> |
| ALDH7A1 | NM_001182.4:c.1301_1302del     | p.Tyr434Cysfs                     | 2              |
| ALDH7A1 | NM_001182.4:c.246+1G>A         | Splice site                       | 1              |
| ALDH7A1 | NM_001182.4:c.364C>T           | p.Arg122Trp                       | 1              |
| ALDH7A1 | NM_001182.4:c.575C>T           | p.Thr192Met                       | 3 <sup>b</sup> |
| ALDH7A1 | NM_001182.4:c.898A>G           | p.Asn300Asp                       | 1              |
| ALG13   | NM_001099922.2:c.320A>G        | p.Asn107Ser                       | 2              |
| ALG13   | NM_001257230.1:c.8A>G          | p.Asn3Ser                         | 2              |
| ARHGEF9 | NM_015185.2:c.1012C>T          | p.Arg338Trp                       | 1              |
| ARHGEF9 | NM_015185.2:c.561+1G>A         | Splice site                       | 2              |
| ARX     | c.426_458dup                   | p.Gly143_Ala153dup                | 1              |
| ATP1A2  | NM_000702.3:c.1777C>T          | p.Arg593Trp                       | 1              |
| ATP1A2  | NM_000702.3:c.2936C>T          | p.Pro979Leu                       | 1              |
| ATP1A3  | NM_152296.4:c.2401G>A          | p.Asp801Asn                       | 3              |
| ATP1A3  | NM_152296.4:c.2415C>G          | p.Asp805Glu                       | 1              |
| ATP1A3  | NM_152296.4:c.2443G>A          | p.Glu815Lys                       | 2              |
| ATP1A3  | NM_152296.4:c.2839G>T          | p.Gly947Trp                       | 1              |
| ATP6AP2 | NM_005765.2:c.321C>T           | Silent                            | 1              |
| ATRX    | NM_000489.4:c.1727C>A          | p.Ser576*                         | 1              |
| CACNA1A | NM_001127221.1:c.1442del       | p.Arg481Profs                     | 1              |
| CACNA1A | NM_001127221.1:c.2360del       | p.Leu787Cysfs                     | 1              |
| CACNA1A | NM_001127221.1:c.4177G>A       | p.Val1393Met                      | 1              |
| CACNA1A | NM_001127221.1:c.4953+1G>T     | Splice site                       | 1              |
| CACNA1A | NM_001127221.1:c.5126T>C       | p.Ile1709Thr                      | 1              |
| CACNA1A | NM_001127221.1:c.5588_5589del  | p.Leu1863Argfs                    | 1              |
| CACNA1A | NM_001127221.1:c.6193-2A>C     | Splice site                       | 1              |
| CACNA1A | NM_001127221.1:c.928_931del    | p.Thr310Phefs                     | 1              |
| CASK    | NM_003688.3:c.-46-?_*5486+?del | Deletion (Entire coding sequence) | 1              |
| CDKL5   | NM_003159.2:c.-162-?_*85+?del  | Deletion (Entire coding sequence) | 1              |
| CDKL5   | NM_003159.2:c.-162-?_1944+?del | Deletion (Exons 2-12)             | 2              |
| CDKL5   | NM_003159.2:c.100-2A>G         | Splice site                       | 1              |
| CDKL5   | NM_003159.2:c.116T>G           | p.Val39Gly                        | 1              |
| CDKL5   | NM_003159.2:c.2345C>A          | p.Ser782*                         | 1              |
| CDKL5   | NM_003159.2:c.508G>T           | p.Glu170*                         | 1              |
| CDKL5   | NM_003159.2:c.533G>A           | p.Arg178Gln                       | 1              |
| CDKL5   | NM_003159.2:c.854G>A           | p.Arg285Lys                       | 1              |
| CHD2    | c.1382_1383delinsAAGTCTGAA     | p.Leu461Glnfs                     | 1              |

| Gene   | hgvs                             | Variant               | n <sup>a</sup> |
|--------|----------------------------------|-----------------------|----------------|
| CHD2   | c.3734dup                        | p.Tyr1246Ilefs        | 1              |
| CHD2   | NM_001271.3:c.1937G>A            | p.Gly646Glu           | 1              |
| CHD2   | NM_001271.3:c.3171_3172del       | p.Glu1058Argfs        | 1              |
| CHD2   | NM_001271.3:c.3782G>A            | p.Trp1261*            | 1              |
| CHD2   | NM_001271.3:c.3787dup            | p.Val1263Glyfs        | 1              |
| CHD2   | NM_001271.3:c.3938G>C            | p.Arg1313Pro          | 1              |
| CHD2   | NM_001271.3:c.4613C>T            | p.Ser1538Phe          | 1              |
| CLCN4  | NM_001830.3:c.2152C>T            | p.Arg718Trp           | 1              |
| CLN3   | NM_001042432.1:c.1056+3A>C       | Intronic              | 1              |
| CLN3   | NM_001042432.1:c.461-?_677+?del  | Deletion (Exons 8-9)  | 1              |
| DEPDC5 | c.1081+2T>G                      | Splice site           | 1              |
| DEPDC5 | c.1555C>T                        | P.Gln519*             | 1              |
| DEPDC5 | c.280-1G>A                       | Splice site           | 1              |
| DEPDC5 | c.3563+1G>C                      | Splice site           | 1              |
| DEPDC5 | c.562+1G>A                       | Splice site           | 3 <sup>b</sup> |
| DEPDC5 | NM_001242896.1:c.-60-?_1666+?del | Deletion (Exons 2-21) | 1              |
| DEPDC5 | NM_001242896.1:c.-60-?_767+?del  | Deletion (Exons 2-12) | 1              |
| DEPDC5 | NM_001242896.1:c.1139del         | p.Phe380Serfs         | 1              |
| DEPDC5 | NM_001242896.1:c.1218-1G>C       | Splice site           | 1              |
| DEPDC5 | NM_001242896.1:c.147-?_193+?del  | Deletion (Exon 4)     | 1              |
| DEPDC5 | NM_001242896.1:c.147-?_363+?dup  | Gain (Exons 4-6)      | 1              |
| DEPDC5 | NM_001242896.1:c.1555C>T         | p.Gln519*             | 1              |
| DEPDC5 | NM_001242896.1:c.21C>G           | p.Tyr7*               | 2              |
| DEPDC5 | NM_001242896.1:c.2548dup         | p.Asp850Glyfs         | 1              |
| DEPDC5 | NM_001242896.1:c.3259C>T         | p.Arg1087*            | 1              |
| DEPDC5 | NM_001242896.1:c.346C>T          | p.Arg116*             | 1              |
| DEPDC5 | NM_001242896.1:c.3868C>T         | p.Gln1290*            | 1              |
| DEPDC5 | NM_001242896.1:c.3994C>T         | p.Arg1332*            | 1              |
| DEPDC5 | NM_001242896.1:c.4207C>T         | p.Gln1403*            | 1              |
| DEPDC5 | NM_001242896.1:c.4446dup         | p.Val1483Cysfs        | 1              |
| DEPDC5 | NM_001242896.1:c.4501C>T         | p.Gln1501*            | 2              |
| DEPDC5 | NM_001242896.1:c.59-?_146+?del   | Deletion (Exon 3)     | 1              |
| DEPDC5 | NM_001242896.1:c.832_833del      | p.Phe278Hisfs         | 1              |
| DIAPH1 | NM_005219.4:c.2540_2541del       | p.Lys847Argfs         | 1              |
| DNM1   | NM_004408.3:c.1081C>G            | p.Arg361Gly           | 1              |
| DYRK1A | NM_001396.3:c.951+4_951+7del     | Intronic              | 1              |
| FOXP1  | NM_005249.4:c.1135del            | p.Leu379Serfs         | 1              |

| Gene          | hgvs                            | Variant                           | n <sup>a</sup> |
|---------------|---------------------------------|-----------------------------------|----------------|
| <i>FOXP1</i>  | NM_005249.4:c.301C>T            | p.Gln101*                         | 1              |
| <i>FOXP1</i>  | NM_005249.4:c.460del            | p.Glu154Argfs                     | 1              |
| <i>GABRA1</i> | NM_000806.5:c.-468-?_*2537+?del | Deletion (Entire coding sequence) | 1              |
| <i>GABRA1</i> | NM_000806.5:c.641G>A            | p.Arg214His                       | 1              |
| <i>GABRB2</i> | NM_021911.2:c.902A>G            | p.Tyr301Cys                       | 1              |
| <i>GABRB3</i> | NM_000814.5:c.-114-?_*4247+?del | Deletion (Entire coding sequence) | 4              |
| <i>GABRG2</i> | c.1248_1249delinsG              | p.Ser416Argfs                     | 1              |
| <i>GABRG2</i> | NM_000816.3:c.-358-?_*2171+?del | Deletion (Entire coding sequence) | 1              |
| <i>GABRG2</i> | NM_000816.3:c.107+1G>A          | Splice site                       | 1              |
| <i>GABRG2</i> | NM_000816.3:c.269C>T            | p.Thr90Met                        | 1              |
| <i>GABRG2</i> | NM_000816.3:c.429dup            | p.Lys144Glufs                     | 1              |
| <i>GABRG2</i> | NM_000816.3:c.530del            | p.Arg177Glnfs                     | 1              |
| <i>GABRG2</i> | NM_000816.3:c.571C>T            | p.Gln191*                         | 1              |
| <i>GABRG2</i> | NM_000816.3:c.95C>A             | p.Ser32*                          | 1              |
| <i>GLDC</i>   | NM_000170.2:c.2T>C              | Initiator codon                   | 3              |
| <i>GLDC</i>   | NM_000170.2:c.499G>T            | p.Glu167*                         | 2              |
| <i>GPHN</i>   | NM_020806.4:c.1156_1159dup      | p.Val387Alafs                     | 1              |
| <i>GPHN</i>   | NM_020806.4:c.144-?_201+?del    | Deletion (Exon 3)                 | 1              |
| <i>GPHN</i>   | NM_020806.4:c.1666C>T           | p.Arg556*                         | 1              |
| <i>GPHN</i>   | NM_020806.4:c.390-?_456+?dup    | Gain (Exon 6)                     | 1              |
| <i>GRIN1</i>  | NM_007327.3:c.2530C>T           | p.Arg844Cys                       | 1              |
| <i>GRIN2A</i> | NM_000833.4:c.-18-?_414+?del    | Deletion (Exon 3)                 | 1              |
| <i>GRIN2A</i> | NM_000833.4:c.1008-?_1122+?del  | Deletion (Exon 5)                 | 1              |
| <i>GRIN2A</i> | NM_000833.4:c.1244dup           | p.Phe416Ilefs                     | 1              |
| <i>GRIN2A</i> | NM_000833.4:c.1510C>T           | p.Arg504Trp                       | 1              |
| <i>GRIN2A</i> | NM_000833.4:c.1961T>C           | p.Ile654Thr                       | 1              |
| <i>GRIN2A</i> | NM_000833.4:c.44T>C             | p.Leu15Pro                        | 1              |
| <i>HNRNPU</i> | NM_031844.2:c.-218-?_*4150+?del | Deletion (Entire coding sequence) | 2              |
| <i>IQSEC2</i> | NM_001111125.2:c.2507C>T        | p.Ala836Val                       | 1              |
| <i>IQSEC2</i> | NM_001111125.2:c.2563C>T        | p.Arg855*                         | 1              |
| <i>KCNA2</i>  | NM_004974.3:c.1214C>T           | p.Pro405Leu                       | 1              |
| <i>KCNA2</i>  | NM_004974.3:c.193C>T            | p.Arg65*                          | 1              |
| <i>KCNA2</i>  | NM_004974.3:c.890G>A            | p.Arg297Gln                       | 1              |
| <i>KCNB1</i>  | NM_004975.2:c.629C>T            | p.Thr210Met                       | 1              |
| <i>KCNC1</i>  | NM_001112741.1:c.959G>A         | p.Arg320His                       | 1              |
| <i>KCNH2</i>  | NM_000238.3:c.1096C>T           | p.Arg366*                         | 1              |
| <i>KCNH2</i>  | NM_000238.3:c.2653_2657del      | p.Arg885Alafs                     | 1              |



| Gene   | Hgvs                            | Variant                           | n <sup>a</sup> |
|--------|---------------------------------|-----------------------------------|----------------|
| KCNH5  | NM_139318.4:c.980G>A            | p.Arg327His                       | 2              |
| KCNMA1 | NM_002247.3:c.2612del           | p.Asn871Ilefs                     | 2              |
| KCNQ2  | NM_172107.2:c.-177-?_*455+?del  | Deletion (Entire coding sequence) | 1              |
| KCNQ2  | NM_172107.2:c.-177-?_1023+?del  | Deletion (Exons 1-7)              | 1              |
| KCNQ2  | NM_172107.2:c.-177-?_296+?del   | Deletion (Exon 1)                 | 1              |
| KCNQ2  | NM_172107.2:c.1217+1G>T         | Splice site                       | 1              |
| KCNQ2  | NM_172107.2:c.1356dup           | p.Lys453Glnfs                     | 1              |
| KCNQ2  | NM_172107.2:c.144dup            | p.Lys49Glnfs                      | 1              |
| KCNQ2  | NM_172107.2:c.1708C>T           | p.Gln570*                         | 1              |
| KCNQ2  | NM_172107.2:c.2245G>T           | p.Glu749*                         | 2              |
| KCNQ2  | NM_172107.2:c.2361dup           | p.Ile788Hisfs                     | 1              |
| KCNQ2  | NM_172107.2:c.297-?_1023+?del   | Deletion (Exons 2-7)              | 1              |
| KCNQ2  | NM_172107.2:c.583T>C            | p.Ser195Pro                       | 1              |
| KCNQ2  | NM_172107.2:c.587C>T            | p.Ala196Val                       | 1              |
| KCNQ2  | NM_172107.2:c.793G>A            | p.Ala265Thr                       | 2              |
| KCNQ2  | NM_172107.2:c.821C>T            | p.Thr274Met                       | 1              |
| KCNQ2  | NM_172107.2:c.997C>T            | p.Arg333Trp                       | 2              |
| KCNQ2  | NM_172107.2:c.998G>A            | p.Arg333Gln                       | 1              |
| KCNQ3  | NM_004519.3:c.61_77del          | p.Gly21*                          | 3              |
| KCNT1  | NM_020822.2:c.1193G>A           | p.Arg398Gln                       | 1              |
| KCNT1  | NM_020822.2:c.1283G>A           | p.Arg428Gln                       | 1              |
| KCNT1  | NM_020822.2:c.1421G>A           | p.Arg474His                       | 1              |
| KCNT1  | NM_020822.2:c.1885A>G           | p.Lys629Glu                       | 1              |
| KCNT1  | NM_020822.2:c.2849G>A           | p.Arg950Gln                       | 1              |
| KCNT1  | NM_020822.2:c.2849G>T           | p.Arg950Leu                       | 1              |
| KCNT1  | NM_020822.2:c.73C>T             | p.Arg25Trp                        | 2              |
| KCNT1  | NM_020822.2:c.862G>A            | p.Gly288Ser                       | 2              |
| MBD5   | NM_018328.4:c.-556-?_397+?del   | Deletion (Exons 6-8)              | 1              |
| MBD5   | NM_018328.4:c.2299_2302del      | p.Asn767Leufs                     | 1              |
| MBD5   | NM_018328.4:c.2633del           | p.Pro878Hisfs                     | 1              |
| MBD5   | NM_018328.4:c.397+1G>A          | Splice site                       | 1              |
| MBD5   | NM_018328.4:c.4455del           | p.Lys1486Asnfs                    | 1              |
| MECP2  | c.1054_1271delins36             | p.Lys352Profs                     | 1              |
| MECP2  | c.729_1172delins127             | p.Gln244Glnfs                     | 1              |
| MECP2  | NM_004992.3:c.-226-?_*8554+?dup | Gain (Entire coding sequence)     | 1              |
| MECP2  | NM_004992.3:c.1157_1197del      | p.Leu386Hisfs                     | 1              |
| MECP2  | NM_004992.3:c.1157_1200del      | p.Leu386Glnfs                     | 1              |

| Gene   | hgvs                                | Variant                           | n <sup>a</sup> |
|--------|-------------------------------------|-----------------------------------|----------------|
| MECP2  | NM_004992.3:c.1216C>T               | p.Gln406*                         | 1              |
| MECP2  | NM_004992.3:c.179G>A                | p.Gly60Asp                        | 1              |
| MECP2  | NM_004992.3:c.316C>T                | p.Arg106Trp                       | 1              |
| MECP2  | NM_004992.3:c.455C>G                | p.Pro152Arg                       | 1              |
| MECP2  | NM_004992.3:c.502C>T                | p.Arg168*                         | 2              |
| MECP2  | NM_004992.3:c.763C>T                | p.Arg255*                         | 5              |
| MECP2  | NM_004992.3:c.808del                | p.Arg270Glufs                     | 1              |
| MECP2  | NM_004992.3:c.916C>T                | p.Arg306Cys                       | 1              |
| MECP2  | Partial Deletion                    | Exon 4                            | 1              |
| MEF2C  | NM_002397.4:c.-142-?_*4363+?del     | Deletion (Entire coding sequence) | 1              |
| MEF2C  | NM_002397.4:c.908dup                | p.Leu303Phefs                     | 1              |
| NEXMIF | c.1783A>T                           | p.Arg595*                         | 1              |
| NEXMIF | NM_001008537.2:c.3011_3014del       | p.Ser1004Ilefs                    | 1              |
| NEXMIF | NM_001008537.2:c.3334del            | p.Ile1112Serfs                    | 1              |
| NHLRC1 | NM_198586.2:c.1091C>A               | p.Ser364*                         | 1              |
| NPRL3  | NM_001077350.2:c.-67-?_*904+?del    | Deletion (Entire coding sequence) | 1              |
| NPRL3  | NM_001077350.2:c.-67-?_*118+?del    | Deletion (Exon 2)                 | 3              |
| NPRL3  | NM_001077350.2:c.-67-?_*188+?del    | Deletion (Exons 2-3)              | 1              |
| NPRL3  | NM_001077350.2:c.1270C>T            | p.Arg424*                         | 1              |
| NPRL3  | NM_001077350.2:c.630-?_*767+?del    | Deletion (Exon 8)                 | 1              |
| NPRL3  | NM_001077350.2:c.954C>G             | p.Tyr318*                         | 1              |
| PCDH19 | c.514G>T                            | p.Glu172*                         | 1              |
| PCDH19 | NM_001184880.1:c.-1676-?_*4633+?del | Deletion (Entire coding sequence) | 2              |
| PCDH19 | NM_001184880.1:c.-1676-?_*2616+?del | Deletion (Exons 1-3)              | 1              |
| PCDH19 | NM_001184880.1:c.1019A>G            | p.Asn340Ser                       | 1              |
| PCDH19 | NM_001184880.1:c.1059_1062del       | p.Glu354Leufs                     | 1              |
| PCDH19 | NM_001184880.1:c.1300C>T            | p.Gln434*                         | 1              |
| PCDH19 | NM_001184880.1:c.1720G>T            | p.Glu574*                         | 1              |
| PCDH19 | NM_001184880.1:c.2502del            | p.Asn834Lysfs                     | 1              |
| PCDH19 | NM_001184880.1:c.2616+1G>A          | Splice site                       | 1              |
| PCDH19 | NM_001184880.1:c.2617-2A>G          | Splice site                       | 1              |
| PCDH19 | NM_001184880.1:c.2619del            | p.Glu874Lysfs                     | 1              |
| PCDH19 | NM_001184880.1:c.374A>G             | p.Asn125Ser                       | 1              |
| PCDH19 | NM_001184880.1:c.471dup             | p.Ser158Leufs                     | 1              |
| PCDH19 | NM_001184880.1:c.659del             | p.Gly220Alafs                     | 1              |
| PIGN   | NM_176787.4:c.1251+1G>A             | Splice site                       | 1              |
| PIGN   | NM_176787.4:c.1860-?_*2370+?dup     | Gain (Exons 21-25)                | 1              |

| Gene         | hgvs                            | Variant                           | n <sup>a</sup> |
|--------------|---------------------------------|-----------------------------------|----------------|
| <i>PIGN</i>  | Partial Deletion                | Exons 5-7                         | 1              |
| <i>PNKP</i>  | NM_007254.3:c.1253_1269dup      | p.Thr424Glyfs                     | 1              |
| <i>PNKP</i>  | NM_007254.3:c.1299-2A>G         | Splice site                       | 1              |
| <i>POLG</i>  | NM_002693.2:c.2542G>A           | p.Gly848Ser                       | 1              |
| <i>PRRT2</i> | NM_145239.2:c.-301-?_*1243+?del | Deletion (Entire coding sequence) | 1              |
| <i>PRRT2</i> | NM_145239.2:c.-65-?_*1243+?del  | Deletion (Entire coding sequence) | 9              |
| <i>PRRT2</i> | NM_145239.2:c.649del            | p.Arg217Glyfs                     | 3              |
| <i>PRRT2</i> | NM_145239.2:c.649dup            | p.Arg217Profs                     | 29             |
| <i>PURA</i>  | NM_005859.4:c.697_699del        | p.Phe233del                       | 1              |
| <i>RELN</i>  | NM_005045.3:c.4901_5797+1405del | Partial Deletion (Exons 33-38)    | 1              |
| <i>SCN1A</i> | NM_001165963.1:c.1008T>G        | p.Cys336Trp                       | 1              |
| <i>SCN1A</i> | NM_001165963.1:c.1028G>C        | p.Gly343Ala                       | 1              |
| <i>SCN1A</i> | NM_001165963.1:c.1129C>T        | p.Arg377*                         | 1              |
| <i>SCN1A</i> | NM_001165963.1:c.1177C>T        | p.Arg393Cys                       | 1              |
| <i>SCN1A</i> | NM_001165963.1:c.1248T>A        | p.Asn416Lys                       | 1              |
| <i>SCN1A</i> | NM_001165963.1:c.1278C>A        | p.Tyr426*                         | 1              |
| <i>SCN1A</i> | NM_001165963.1:c.1278C>G        | p.Tyr426*                         | 1              |
| <i>SCN1A</i> | NM_001165963.1:c.1738dup        | p.Arg580Profs                     | 1              |
| <i>SCN1A</i> | NM_001165963.1:c.2134C>T        | p.Arg712*                         | 1              |
| <i>SCN1A</i> | NM_001165963.1:c.2495G>A        | p.Trp832*                         | 1              |
| <i>SCN1A</i> | NM_001165963.1:c.2593C>T        | p.Arg865*                         | 1              |
| <i>SCN1A</i> | NM_001165963.1:c.2624C>T        | p.Thr875Met                       | 1              |
| <i>SCN1A</i> | NM_001165963.1:c.264+3G>C       | Intronic                          | 1              |
| <i>SCN1A</i> | NM_001165963.1:c.264+4_264+7del | Intronic                          | 1              |
| <i>SCN1A</i> | NM_001165963.1:c.2729A>G        | p.Gln910Arg                       | 1              |
| <i>SCN1A</i> | NM_001165963.1:c.2831T>C        | p.Val944Ala                       | 1              |
| <i>SCN1A</i> | NM_001165963.1:c.2837G>A        | p.Arg946His                       | 1              |
| <i>SCN1A</i> | NM_001165963.1:c.2860G>A        | p.Glu954Lys                       | 1              |
| <i>SCN1A</i> | NM_001165963.1:c.2869T>G        | p.Trp957Gly                       | 1              |
| <i>SCN1A</i> | NM_001165963.1:c.2947G>A        | p.Val983Ile                       | 1              |
| <i>SCN1A</i> | NM_001165963.1:c.2947G>T        | p.Val983Phe                       | 1              |
| <i>SCN1A</i> | NM_001165963.1:c.2956C>T        | p.Leu986Phe                       | 1              |
| <i>SCN1A</i> | NM_001165963.1:c.2983T>C        | p.Phe995Leu                       | 1              |
| <i>SCN1A</i> | NM_001165963.1:c.301C>T         | p.Arg101Trp                       | 1              |
| <i>SCN1A</i> | NM_001165963.1:c.3104_3110del   | p.Gln1035Profs                    | 1              |
| <i>SCN1A</i> | NM_001165963.1:c.3173_3176del   | p.Lys1058Thrfs                    | 1              |
| <i>SCN1A</i> | NM_001165963.1:c.3371_3372del   | p.Phe1124*                        | 1              |

| Gene  | Hgvs                               | Variant                       | n <sup>a</sup> |
|-------|------------------------------------|-------------------------------|----------------|
| SCN1A | NM_001165963.1:c.3407C>A           | p.Ser1136*                    | 1              |
| SCN1A | NM_001165963.1:c.3637C>T           | p.Arg1213*                    | 2              |
| SCN1A | NM_001165963.1:c.3649_3650insTT    | p.His1217Leufs                | 1              |
| SCN1A | NM_001165963.1:c.3715_3721dup      | p.Tyr1241*                    | 1              |
| SCN1A | NM_001165963.1:c.3724_3725dup      | p.Asp1243Leufs                | 1              |
| SCN1A | NM_001165963.1:c.379C>T            | p.His127Tyr                   | 1              |
| SCN1A | NM_001165963.1:c.3925C>G           | p.Leu1309Val                  | 1              |
| SCN1A | NM_001165963.1:c.3925C>T           | p.Leu1309Phe                  | 1              |
| SCN1A | NM_001165963.1:c.4057G>T           | p.Val1353Phe                  | 1              |
| SCN1A | NM_001165963.1:c.4219C>T           | p.Arg1407*                    | 1              |
| SCN1A | NM_001165963.1:c.4295A>T           | p.Lys1432Ile                  | 1              |
| SCN1A | NM_001165963.1:c.4352C>T           | p.Pro1451Leu                  | 1              |
| SCN1A | NM_001165963.1:c.4372del           | p.Tyr1458Thrfs                | 1              |
| SCN1A | NM_001165963.1:c.4414T>C           | p.Phe1472Leu                  | 1              |
| SCN1A | NM_001165963.1:c.4428C>A           | p.Asn1476Lys                  | 1              |
| SCN1A | NM_001165963.1:c.4453A>G           | p.Asn1485Asp                  | 1              |
| SCN1A | NM_001165963.1:c.4515_4516del      | p.Lys1506Ilefs                | 1              |
| SCN1A | NM_001165963.1:c.4541T>G           | p.Leu1514*                    | 1              |
| SCN1A | NM_001165963.1:c.4656T>A           | p.Cys1552*                    | 1              |
| SCN1A | NM_001165963.1:c.4787G>A           | p.Arg1596His                  | 1              |
| SCN1A | NM_001165963.1:c.4822G>T           | p.Asp1608Tyr                  | 1              |
| SCN1A | NM_001165963.1:c.4852+1G>A         | Splice site                   | 1              |
| SCN1A | NM_001165963.1:c.487_496del        | p.Gly163Leufs                 | 1              |
| SCN1A | NM_001165963.1:c.4907G>A           | p.Arg1636Gln                  | 1              |
| SCN1A | NM_001165963.1:c.4966_4969dup      | p.Arg1657Hisfs                | 1              |
| SCN1A | NM_001165963.1:c.4973C>T           | p.Thr1658Met                  | 1              |
| SCN1A | NM_001165963.1:c.530G>A            | p.Gly177Glu                   | 1              |
| SCN1A | NM_001165963.1:c.5488_5489del      | p.Gln1830Valfs                | 1              |
| SCN1A | NM_001165963.1:c.5656C>T           | p.Arg1886*                    | 1              |
| SCN1A | NM_001165963.1:c.5754del           | p.Ala1919Leufs                | 1              |
| SCN1A | NM_001165963.1:c.5781_5782delinsTG | p.Arg1927_Arg1928delinsSerGly | 1              |
| SCN1A | NM_001165963.1:c.580G>A            | p.Asp194Asn                   | 1              |
| SCN1A | NM_001165963.1:c.673A>G            | p.Lys225Glu                   | 1              |
| SCN1A | NM_001165963.1:c.680T>G            | p.Ile227Ser                   | 2              |
| SCN1A | NM_001165963.1:c.752T>G            | p.Met251Arg                   | 1              |
| SCN1B | NM_199037.3:c.363C>G               | p.Cys121Trp                   | 3              |
| SCN2A | NM_021007.2:c.1019dup              | p.Asn340Lysfs                 | 1              |

| Gene    | hgvs                                | Variant                    | n <sup>a</sup> |
|---------|-------------------------------------|----------------------------|----------------|
| SCN2A   | NM_021007.2:c.2995G>A               | p.Glu999Lys                | 1              |
| SCN2A   | NM_021007.2:c.3400-?_*2486+?del     | Deletion (Exons 18-27)     | 3              |
| SCN2A   | NM_021007.2:c.3631G>A               | p.Glu1211Lys               | 1              |
| SCN2A   | NM_021007.2:c.4879G>A               | p.Val1627Met               | 1              |
| SCN2A   | NM_021007.2:c.647T>G                | p.Leu216Trp                | 1              |
| SCN2A   | NM_021007.2:c.668G>A                | p.Arg223Gln                | 1              |
| SCN2A   | NM_021007.2:c.685T>G                | p.Ser229Ala                | 1              |
| SCN2A   | NM_021007.2:c.788C>T                | p.Ala263Val                | 1              |
| SCN8A   | NM_014191.3:c.5615G>A               | p.Arg1872Gln               | 1              |
| SCN8A   | NM_014191.3:c.5630A>G               | p.Asn1877Ser               | 2              |
| SCN8A   | NM_014191.3:c.779T>C                | p.Phe260Ser                | 1              |
| SCN9A   | NM_002977.3:c.5843A>C               | p.Asp1948Ala               | 1              |
| SCN9A   | NM_002977.3:c.829C>T                | p.Arg277*                  | 1              |
| SCN9A   | NM_002977.3:c.902-2A>C              | Splice site                | 1              |
| SLC13A5 | NM_177550.4:c.1280C>T               | p.Ser427Leu                | 1              |
| SLC2A1  | NM_006516.2:c.1198C>T               | p.Arg400Cys                | 1              |
| SLC2A1  | NM_006516.2:c.277C>T                | p.Arg93Trp                 | 1              |
| SLC2A1  | NM_006516.2:c.400G>A                | p.Gly134Ser                | 2              |
| SLC2A1  | NM_006516.2:c.667C>T                | p.Arg223Trp                | 1              |
| SLC2A1  | NM_006516.2:c.680-11G>A             | Intronic                   | 1              |
| SLC2A1  | NM_006516.2:c.751_757dup            | p.Arg253Hisfs              | 1              |
| SLC2A1  | NM_006516.2:c.884C>T                | p.Thr295Met                | 1              |
| SLC6A1  | NM_003042.3:c.1024G>A               | p.Val342Met                | 1              |
| SLC6A1  | NM_003042.3:c.1460T>C               | p.Met487Thr                | 1              |
| SLC6A1  | NM_003042.3:c.223G>A                | p.Gly75Arg                 | 1              |
| SLC6A8  | c.1006_1008del                      | p.Asn336del                | 1              |
| SLC6A8  | NM_005629.3:c.1222_1224del          | p.Phe408del                | 1              |
| SLC6A8  | NM_005629.3:c.1659C>G               | p.Tyr553*                  | 1              |
| SLC9A6  | NM_006359.2:c.1013_1025delinsTCAGCC | p.Trp338Phefs              | 1              |
| SMC1A   | NM_006306.3:c.3103C>T               | p.Arg1035*                 | 1              |
| SMC1A   | NM_006306.3:c.3249dup               | p.Ile1084Aspfs             | 1              |
| SMC1A   | NM_006306.3:c.392del                | p.Arg131Leufs              | 1              |
| SPTAN1  | NM_001130438.2:c.6843_6848del       | p.Ile2282_Leu2283del       | 1              |
| STX1B   | NM_052874.4:c.-242-?_*3565+?del     | Deletion (Entire sequence) | 1              |
| STX1B   | NM_052874.4:c.106-1G>C              | Splice site                | 1              |
| STX1B   | NM_052874.4:c.205+2_205+3del        | Splice site                | 1              |
| STX1B   | NM_052874.4:c.281-2A>C              | Splice site                | 1              |

| Gene    | hgvs                       | Variant            | n <sup>a</sup> |
|---------|----------------------------|--------------------|----------------|
| STXBP1  | NM_003165.3:c.1099C>T      | p.Arg367*          | 1              |
| STXBP1  | NM_003165.3:c.1162C>T      | p.Arg388*          | 1              |
| STXBP1  | NM_003165.3:c.1216C>T      | p.Arg406Cys        | 1              |
| STXBP1  | NM_003165.3:c.1217G>A      | p.Arg406His        | 1              |
| STXBP1  | NM_003165.3:c.1258G>T      | p.Glu420*          | 1              |
| STXBP1  | NM_003165.3:c.1652G>A      | p.Arg551His        | 2              |
| STXBP1  | NM_003165.3:c.1702+1G>A    | Splice site        | 1              |
| STXBP1  | NM_003165.3:c.22_32dup     | p.Glu12Leufs       | 1              |
| STXBP1  | NM_003165.3:c.247-1G>A     | Splice site        | 1              |
| STXBP1  | NM_003165.3:c.265del       | p.Ser89Valfs       | 1              |
| STXBP1  | NM_003165.3:c.385A>C       | p.Thr129Pro        | 1              |
| STXBP1  | NM_003165.3:c.569G>A       | p.Arg190Gln        | 1              |
| STXBP1  | NM_003165.3:c.817G>T       | p.Glu273*          | 1              |
| SYNGAP1 | NM_006772.2:c.1453del      | p.Arg485Alafs      | 1              |
| SYNGAP1 | NM_006772.2:c.1802C>A      | p.Ala601Glu        | 1              |
| SYNGAP1 | NM_006772.2:c.2059C>T      | p.Arg687*          | 1              |
| SYNGAP1 | NM_006772.2:c.2147G>A      | p.Arg716Gln        | 1              |
| SYNGAP1 | NM_006772.2:c.3060del      | p.Gln1021Serfs     | 1              |
| SYNGAP1 | NM_006772.2:c.3233_3236del | p.Val1078Alafs     | 1              |
| SYNGAP1 | NM_006772.2:c.333del       | p.Lys114Serfs      | 1              |
| SYNGAP1 | NM_006772.2:c.3706C>T      | p.Gln1236*         | 1              |
| SYNGAP1 | NM_006772.2:c.91C>T        | p.Arg31*           | 1              |
| SYNGAP1 | NM_006772.2:c.937G>T       | p.Glu313*          | 1              |
| TBC1D24 | NM_001199107.1:c.457G>A    | p.Glu153Lys        | 1              |
| TBC1D24 | NM_001199107.1:c.845C>G    | p.Pro282Arg        | 3              |
| TCF4    | NM_001083962.1:c.1169del   | p.Leu390*          | 1              |
| TCF4    | NM_001083962.1:c.520C>T    | p.Arg174*          | 1              |
| TCF4    | NM_001083962.1:c.923-2A>G  | Splice site        | 1              |
| TPP1    | NM_000391.3:c.182T>G       | p.Leu61Arg         | 1              |
| TPP1    | NM_000391.3:c.229G>C       | p.Gly77Arg         | 3              |
| TPP1    | NM_000391.3:c.509-1G>C     | Splice site        | 3              |
| TPP1    | NM_000391.3:c.622C>T       | p.Arg208*          | 1              |
| TSC1    | NM_000368.4:c.1439-1G>C    | Splice site        | 1              |
| TSC1    | NM_000368.4:c.1498C>T      | p.Arg500*          | 1              |
| TSC2    | NM_000548.3:c.1108C>T      | p.Gln370*          | 1              |
| TSC2    | NM_000548.3:c.1832G>A      | p.Arg611Gln        | 2              |
| TSC2    | NM_000548.3:c.1855_1863dup | p.Leu619_Leu621dup | 1              |

| Gene  | hgvs                           | Variant                           | n <sup>a</sup> |
|-------|--------------------------------|-----------------------------------|----------------|
| TSC2  | NM_000548.3:c.2087G>A          | p.Cys696Tyr                       | 1              |
| TSC2  | NM_000548.3:c.2108G>A          | p.Trp703*                         | 1              |
| TSC2  | NM_000548.3:c.2410T>C          | p.Cys804Arg                       | 1              |
| TSC2  | NM_000548.3:c.2714G>A          | p.Arg905Gln                       | 1              |
| TSC2  | NM_000548.3:c.336+1G>C         | Splice site                       | 1              |
| TSC2  | NM_000548.3:c.3598C>T          | p.Arg1200Trp                      | 1              |
| TSC2  | NM_000548.3:c.4508A>C          | p.Gln1503Pro                      | 1              |
| TSC2  | NM_000548.3:c.4544_4547del     | p.Asn1515Serfs                    | 1              |
| TSC2  | NM_000548.3:c.4912_4914del     | p.Lys1638del                      | 1              |
| TSC2  | NM_000548.3:c.5024C>T          | p.Pro1675Leu                      | 1              |
| UBE3A | Gain                           | Entire sequence                   | 2              |
| UBE3A | NM_130838.1:c.-44-?_*1888+?del | Deletion (Entire coding sequence) | 4              |
| UBE3A | NM_130838.1:c.-44-?_*1888+?dup | Gain (Entire coding sequence)     | 3              |
| UBE3A | NM_130838.1:c.2507_2510del     | p.Lys836Argfs                     | 1              |
| UBE3A | NM_130838.1:c.317_321del       | p.Thr106Argfs                     | 1              |
| WDR45 | c.10C>T                        | p.Gln4*                           | 1              |
| WDR45 | NM_007075.3:c.210_213dup       | p.Pro72*                          | 1              |
| WDR45 | NM_007075.3:c.873C>G           | p.Tyr291*                         | 1              |
| WVOX  | NM_016373.3:c.127C>T           | p.Gln43*                          | 1              |
| WVOX  | NM_016373.3:c.321C>G           | p.Tyr107*                         | 1              |
| ZEB2  | NM_014795.3:c.1277T>A          | p.Leu426*                         | 1              |

<sup>a</sup>Sum of variants will not equal number of molecular diagnoses patients because patients could have more than one variant in a given gene. <sup>b</sup>Variant observed in multiple individuals of a single family.

**eTable 4.** Patient Outcomes After Treatment Changes by Gene With Diagnostic Finding

| Gene    | Diagnostic finding, n | Clinical management change, n (% result) | Outcomes available, n (% changes) | Patient outcomes, n (% with outcomes available) |                  |           |
|---------|-----------------------|------------------------------------------|-----------------------------------|-------------------------------------------------|------------------|-----------|
|         |                       |                                          |                                   | Positive outcome                                | Negative outcome | No change |
| SCN1A   | 64                    | 48 (75.0)                                | 42 (87.5)                         | 35 (83.3)                                       | 4 (9.5)          | 3 (7.1)   |
| PRRT2   | 41                    | 16 (39.0)                                | 13 (81.3)                         | 12 (92.3)                                       | 0                | 1 (7.7)   |
| TSC2    | 14                    | 11 (78.6)                                | 9 (81.8)                          | 8 (88.9)                                        | 0                | 1 (11.1)  |
| KCNQ2   | 19                    | 10 (52.6)                                | 8 (80.0)                          | 8 (100)                                         | 0                | 0         |
| DEPDC5  | 27                    | 10 (37.0)                                | 8 (80.0)                          | 7 (87.5)                                        | 0                | 1 (12.5)  |
| PCDH19  | 15                    | 9 (60.0)                                 | 7 (77.8)                          | 6 (85.7)                                        | 1 (14.3)         | 0         |
| STXBP1  | 14                    | 7 (50.0)                                 | 7 (100)                           | 3 (42.9)                                        | 2 (28.6)         | 2 (28.6)  |
| SLC2A1  | 8                     | 7 (87.5)                                 | 5 (71.4)                          | 4 (80.0)                                        | 1 (20.0)         | 0         |
| NPRL3   | 8                     | 5 (62.5)                                 | 5 (100)                           | 3 (60.0)                                        | 1 (20.0)         | 1 (20.0)  |
| KCNT1   | 10                    | 5 (50.0)                                 | 5 (100)                           | 2 (40.0)                                        | 1 (20.0)         | 2 (40.0)  |
| CACNA1A | 8                     | 4 (50.0)                                 | 4 (100)                           | 3 (75.0)                                        | 0                | 1 (25.0)  |
| CHD2    | 8                     | 4 (50.0)                                 | 4 (100)                           | 1 (25.0)                                        | 2 (50.0)         | 1 (25.0)  |
| MECP2   | 16                    | 10 (62.5)                                | 4 (40.0)                          | 1 (25.0)                                        | 1 (25.0)         | 2 (50.0)  |
| SCN2A   | 9                     | 5 (55.6)                                 | 4 (80.0)                          | 3 (75.0)                                        | 0                | 1 (25.0)  |
| SYNGAP1 | 10                    | 4 (40.0)                                 | 4 (100)                           | 2 (50.0)                                        | 1 (25.0)         | 1 (25.0)  |
| ATP1A3  | 7                     | 5 (71.4)                                 | 3 (60.0)                          | 2 (66.7)                                        | 0                | 1 (33.3)  |
| ALDH7A1 | 6                     | 4 (66.7)                                 | 2 (50.0)                          | 2 (100)                                         | 0                | 0         |
| CDKL5   | 8                     | 3 (37.5)                                 | 2 (66.7)                          | 1 (50.0)                                        | 0                | 1 (50.)   |
| GRIN2A  | 6                     | 2 (33.3)                                 | 2 (100)                           | 1 (50.0)                                        | 1 (50.0)         | 0         |
| SCN1B   | 3                     | 2 (66.7)                                 | 2 (100)                           | 1 (50.0)                                        | 0                | 1 (50.0)  |
| SCN8A   | 4                     | 2 (50.0)                                 | 2 (100)                           | 2 (100)                                         | 0                | 0         |
| TBC1D24 | 4                     | 2 (50.0)                                 | 2 (100)                           | 2 (100)                                         | 0                | 0         |
| TSC1    | 2                     | 2 (100)                                  | 2 (100)                           | 1 (50.0)                                        | 0                | 1 (100)   |
| UBE3A   | 7                     | 2 (28.6)                                 | 2 (100)                           | 2 (100)                                         | 0                | 0         |
| ALG13   | 4                     | 2 (50.0)                                 | 1 (50.0)                          | 0                                               | 0                | 1 (100)   |
| ARHGEF9 | 2                     | 1 (50.0)                                 | 1 (100)                           | 1 (100)                                         | 0                | 0         |
| ATP1A2  | 2                     | 2 (100)                                  | 1 (50.0)                          | 1 (100)                                         | 0                | 0         |
| GLDC    | 2                     | 1 (50.0)                                 | 1 (100)                           | 1 (100)                                         | 0                | 0         |
| GRIN1   | 1                     | 1 (100)                                  | 1 (100)                           | 1 (100)                                         | 0                | 0         |



| Gene           | Diagnostic finding, n | Clinical management change, n (% result) | Outcomes available, n (% changes) | Patient outcomes, n (% with outcomes available) |                  |           |
|----------------|-----------------------|------------------------------------------|-----------------------------------|-------------------------------------------------|------------------|-----------|
|                |                       |                                          |                                   | Positive outcome                                | Negative outcome | No change |
| <i>HNRNPU</i>  | 2                     | 2 (100)                                  | 1 (50.0)                          | 0                                               | 0                | 1 (100)   |
| <i>KCNH2</i>   | 2                     | 2 (100)                                  | 1 (50.0)                          | 1 (100)                                         | 0                | 0         |
| <i>KCNMA1</i>  | 1                     | 1 (100)                                  | 1 (100)                           | 0                                               | 1 (100)          | 0         |
| <i>KCNQ3</i>   | 1                     | 1 (100)                                  | 1 (100)                           | 1 (100)                                         | 0                | 0         |
| <i>MBD5</i>    | 5                     | 1 (20.0)                                 | 1 (100)                           | 1 (100)                                         | 0                | 0         |
| <i>POLG</i>    | 1                     | 1 (100)                                  | 1 (100)                           | 1 (100)                                         | 0                | 0         |
| <i>PURA</i>    | 1                     | 1 (100)                                  | 1 (100)                           | 0                                               | 0                | 1 (100)   |
| <i>RELN</i>    | 1                     | 1 (100)                                  | 1 (100)                           | 1 (100)                                         | 0                | 0         |
| <i>SLC13A5</i> | 1                     | 1 (100)                                  | 1 (100)                           | 1 (100)                                         | 0                | 0         |
| <i>SLC6A1</i>  | 3                     | 1 (33.3)                                 | 1 (100)                           | 0                                               | 0                | 1 (100)   |
| <i>SLC6A8</i>  | 3                     | 2 (66.7)                                 | 1 (50.0)                          | 1 (100)                                         | 0                | 0         |
| <i>SPTAN1</i>  | 1                     | 1 (100)                                  | 1 (100)                           | 0                                               | 0                | 1 (100)   |
| <i>TCF4</i>    | 3                     | 1 (33.3)                                 | 1 (100)                           | 1 (100)                                         | 0                | 0         |
| <i>TPP1</i>    | 4                     | 3 (75.0)                                 | 1 (33.3)                          | 1 (100)                                         | 0                | 0         |
| <i>WDR45</i>   | 3                     | 2 (66.7)                                 | 1 (50.0)                          | 0                                               | 0                | 1 (100)   |
| <i>WVOX</i>    | 1                     | 1 (100)                                  | 1 (100)                           | 1 (100)                                         | 0                | 0         |
| <i>ZEB2</i>    | 1                     | 1 (100)                                  | 1 (100)                           | 1 (100)                                         | 0                | 0         |

**eTable 5.** Summary of Treatment Changes Noted for Patients With Seizures That Resolved<sup>a</sup>

| Number of Cases | Gene           | Example of Treatment(s) Stopped        | Example of Treatment(s) Started                                                                 |
|-----------------|----------------|----------------------------------------|-------------------------------------------------------------------------------------------------|
| 11              | <i>PRRT2</i>   | GABA Modulator; Sodium valproate       | Sodium Channel Blocker                                                                          |
| 8               | <i>KCNQ2</i>   | GABA Modulator; Sodium valproate       | Sodium Channel Blocker                                                                          |
| 6               | <i>TSC2</i>    | None                                   | ACTH; GABA Modulator; Sodium valproate                                                          |
| 5               | <i>SCN1A</i>   | Sodium Channel Blocker                 | Calcium Channel Blockers; Cannabidiol; GABA Modulator; Sodium valproate; Vagal nerve stimulator |
| 4               | <i>DEPDC5</i>  | None                                   | Resection surgery; Sodium Channel Blocker                                                       |
| 4               | <i>MECP2</i>   | None                                   | None                                                                                            |
| 4               | <i>PCDH19</i>  | GABA Modulator                         | Calcium Channel Blockers; GABA Modulator; Sodium Channel Blocker; Sodium valproate              |
| 3               | <i>ALDH7A1</i> | GABA Modulator; Sodium Channel Blocker | Pyridoxine                                                                                      |
| 3               | <i>NPRL3</i>   | GABA Modulator                         | GABA Modulator; Hemispherectomy; Sodium Channel Blockers                                        |
| 3               | <i>SCN2A</i>   | GABA Modulator; Sodium valproate       | Sodium Channel Blocker                                                                          |
| 2               | <i>CACNA1A</i> | None                                   | Sodium valproate                                                                                |
| 2               | <i>GABRG2</i>  | None                                   | None                                                                                            |
| 2               | <i>SCN1B</i>   | None                                   | None                                                                                            |
| 2               | <i>STXBP1</i>  | None                                   | Sodium valproate                                                                                |
| 2               | <i>WDR45</i>   | None                                   | None                                                                                            |

<sup>a</sup>Information not provided for genes with only one patient, including *ATP1A2*, *CHD2*, *GLDC*, *KCNT1*, *POLG*, *RELN*, *SLC2A1*, *SLC6A8*, *STX1B*, *SYNGAP1*, and *UBE3A*.

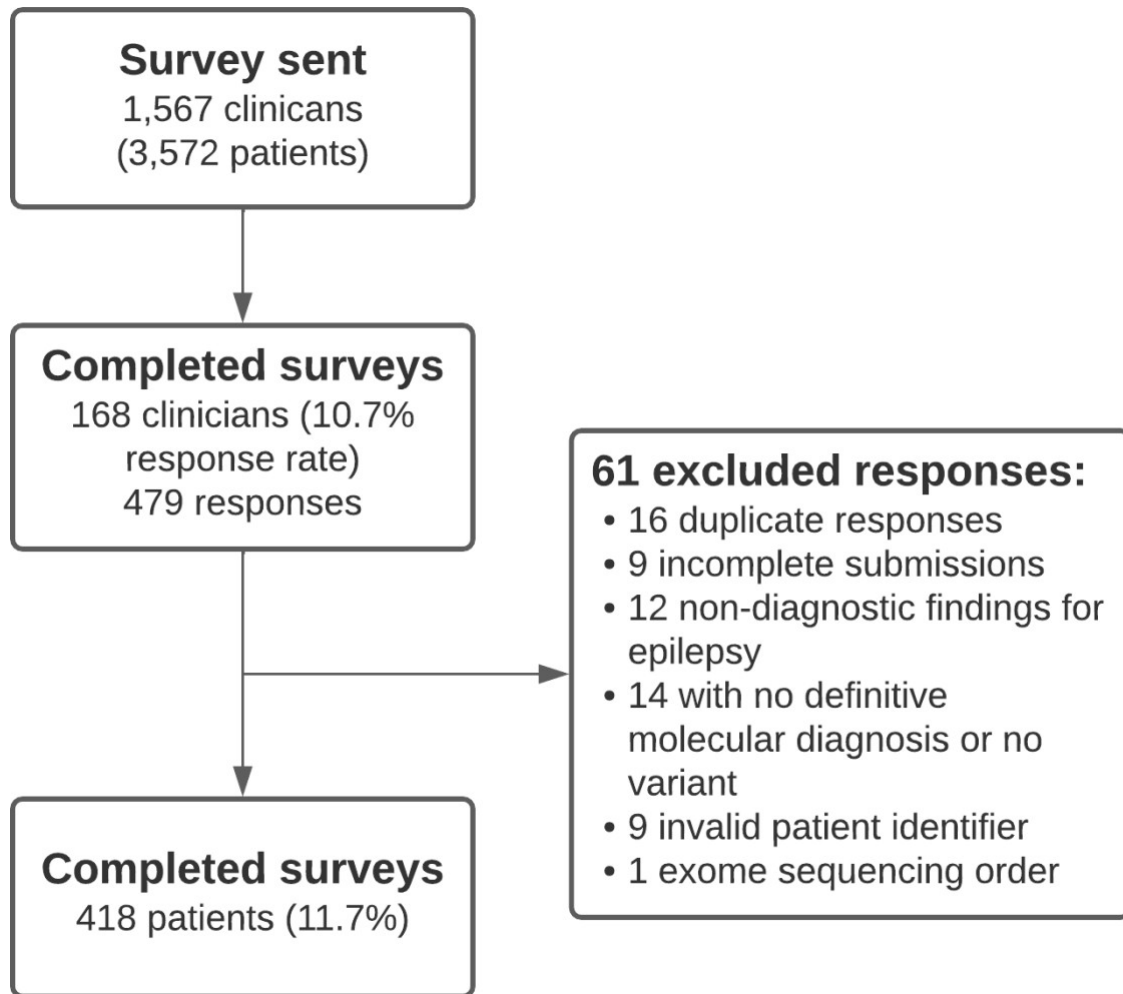

**eFigure 1. Flowchart of Cohort Development** Three families had more than one related participant: two families with two relatives; one family with three relatives included in the cohort.

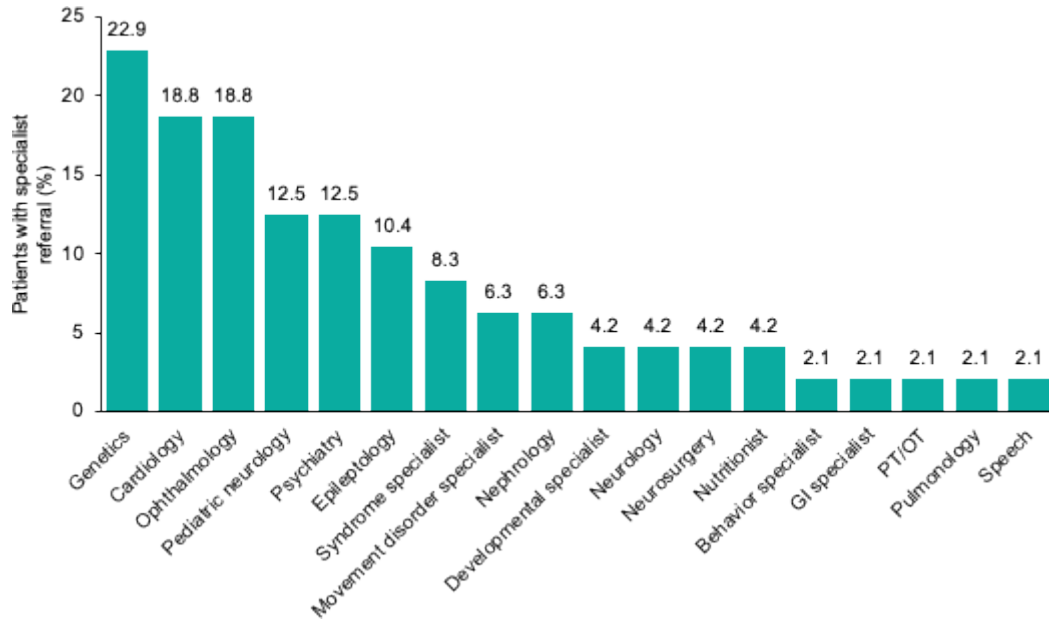

**eFigure 2. Types of Referrals to Specialists** Among 48 patients with a referral to a specialist, the types of referrals are reported. Patients may have had more than one referral, and are included in each appropriate category.

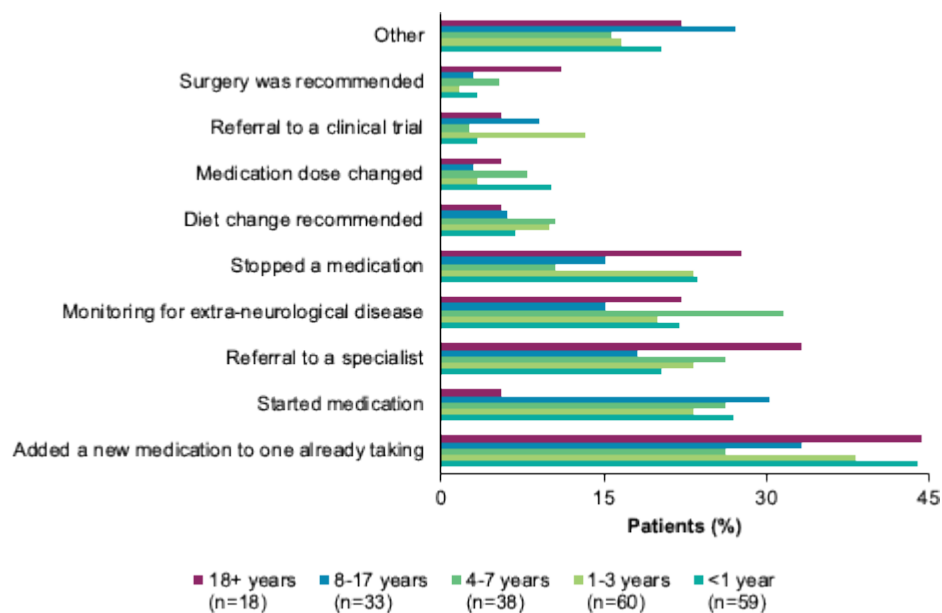

**eFigure 3. Clinical Management Changes by Age** The percent of patients with each clinical management change after diagnostic genetic testing was calculated by age group. A patient could have more than one recommendation reported and is included in each recommendation category. The most common change for all patient age groups was to add or start a new medication. HCPs also reported referring the patient to a specialist, monitoring for extra-neurological disease, or stopping a medication in 15-30% of patients in all age groups. Less common actions included a change to diet, a medication dose change, referral to a clinical trial or recommendation for surgery.

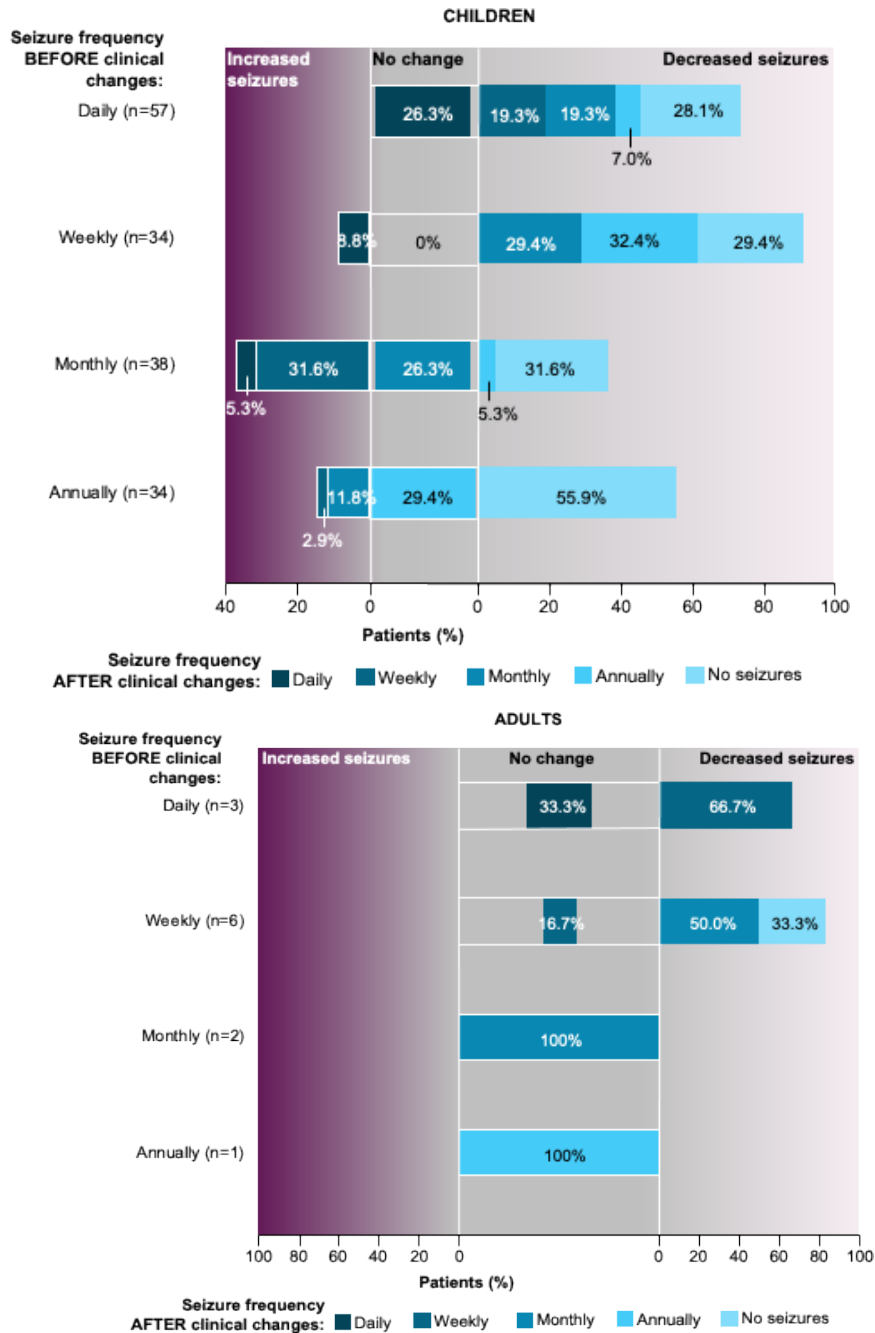

**eFigure 4. Frequency of Seizures Before and After Changes in Clinical Management in Pediatric and Adult Cohorts**

Seizure frequency changes after treatment changes in children (top) and adults (bottom). Individuals were grouped by their initial reported seizure frequency (daily, weekly, monthly, annual, or no seizures) prior to genetic testing and treatment changes on the Y axis. The reported seizure frequency after treatment changes is represented on the X axis. Only individuals who had a response provided for both pre- and post-treatment were included in this analysis.
